# Supplementary material for: Aptamer-Based Recognition of Breast Tumor Cells: A New Era for Breast Cancer Diagnosis
Source: MDPI journal article supplement (doi:10.3390/ijms25020840), 2024-01-10
Supplement: s1 [file s1]

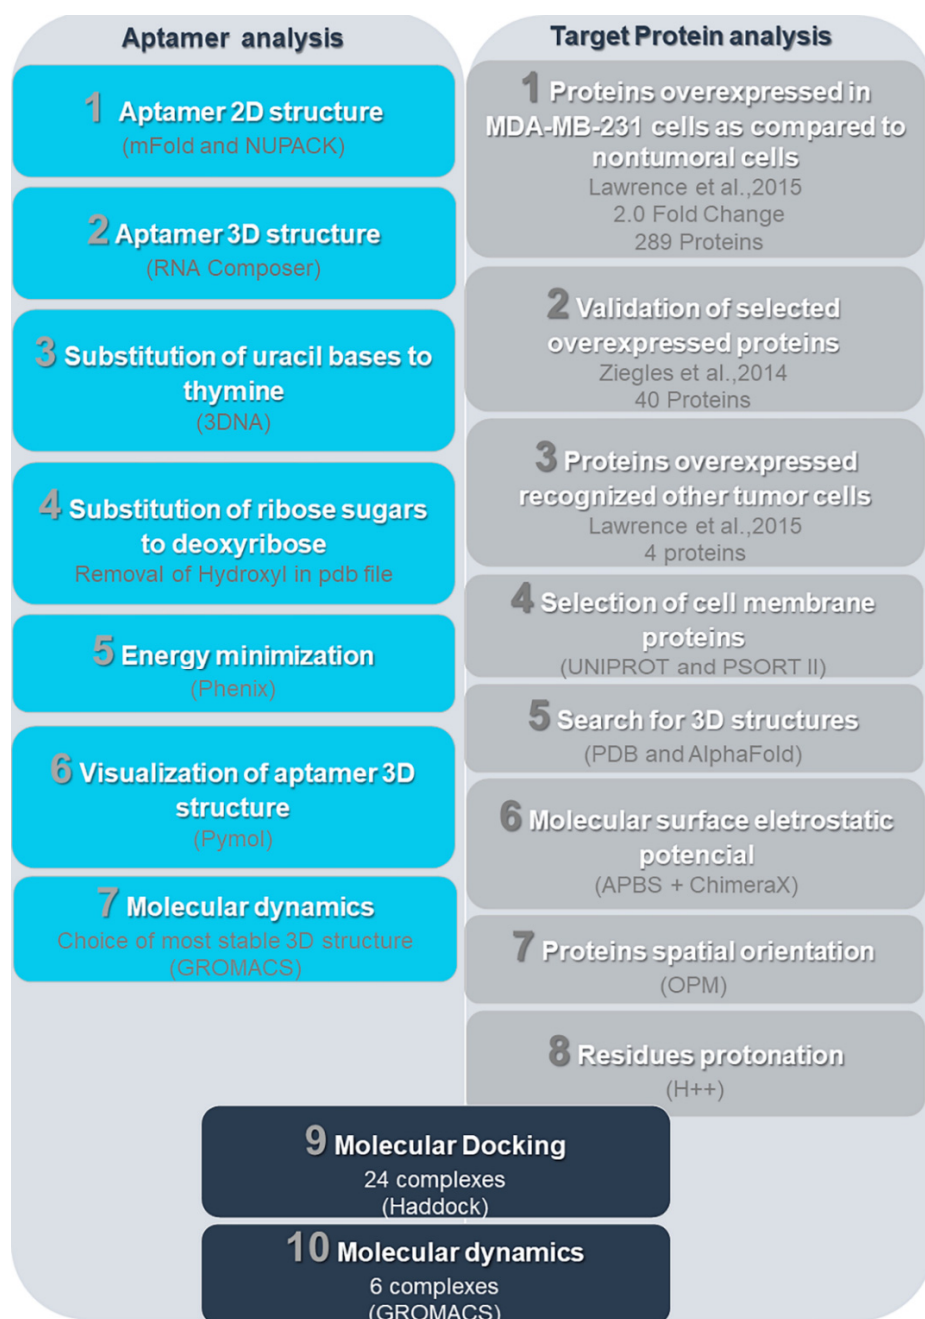

**Figure S1.** Workflow for predicting the structure of aptamers and selecting target proteins.

**Table S1.** Plasma membrane proteins differentially expressed in the MDA-MB-231 strain selected after the validation stage.

| Gene    | ID UNIPROT | Cellular location (Uniprot) |
|---------|------------|-----------------------------|
| CSKP    | O14936-3   | plasma membrane             |
| TMEM205 | K7ELQ9     | plasma membrane             |
| TM209   | Q96SK2-2   | plasma membrane             |
| TM245   | Q9H330-2   | plasma membrane             |
| SCAM4   | Q969E2-2   | plasma membrane             |
| AGRE5   | P48960     | plasma membrane             |

G3V2K7  
TM9S3  
AT2B1  
**AT2B3**  
E9PL82  
1A03HLA-A  
TSP1  
CD151  
VAMP7  
ADAM9  
E41L2  
E9PPD9  
TMX4  
CD63  
HLA-A  
EGFR  
PIP4P2  
TMCC1  
TM55B  
CD44  
EPHA2  
NCS1  
TMEM106C  
CEMIP2  
MAGI3  
TMEM237  
TMEM181  
VAPA  
TMED10  
TMCO4  
CD46  
SMAP1  
TMEM199  
TMTC3

|          |                 |
|----------|-----------------|
| G3V2K7   | plasma membrane |
| Q9HD45   | plasma membrane |
| P20020-6 | plasma membrane |
| Q16720-8 | plasma membrane |
| E9PL82   | plasma membrane |
| P04439   | plasma membrane |
| P07996   | plasma membrane |
| P48509   | plasma membrane |
| P51809   | plasma membrane |
| Q13443   | plasma membrane |
| O43491   | plasma membrane |
| E9PPD9   | plasma membrane |
| A2BDY9   | plasma membrane |
| F8VV56   | plasma membrane |
| P10316   | plasma membrane |
| P00533   | plasma membrane |
| D6RBT7   | plasma membrane |
| O94876   | plasma membrane |
| U6CTL2   | plasma membrane |
| P16070-4 | plasma membrane |
| P29317   | plasma membrane |
| P62166   | plasma membrane |
| Q9NUM4   | plasma membrane |
| Q9UHN6   | plasma membrane |
| Q5TCQ9   | plasma membrane |
| Q96Q45   | plasma membrane |
| Q9P2C4   | plasma membrane |
| Q9P0L0   | plasma membrane |
| G3V2K7   | plasma membrane |
| Q5TGY1   | plasma membrane |
| Q6VE48   | plasma membrane |
| Q8IYB5   | plasma membrane |
| Q8N511   | plasma membrane |
| Q6ZXV5   | plasma membrane |

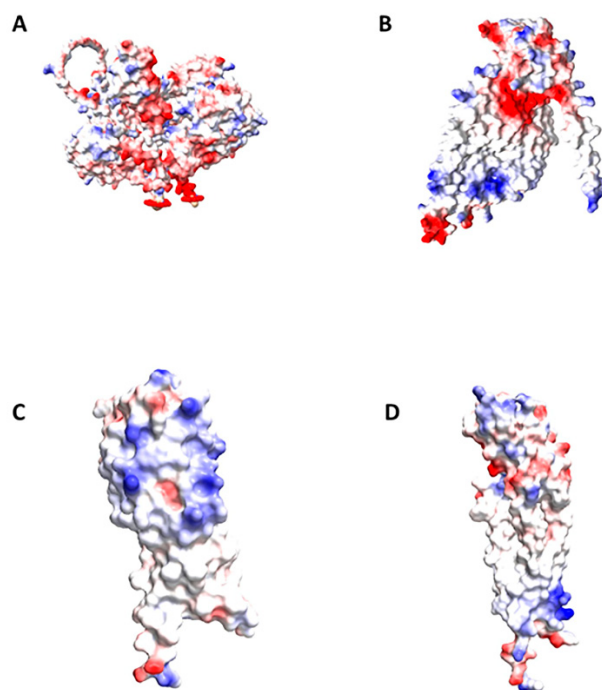

**Figure S2.** Representation of the electrostatic potential of the proteins selected for the molecular docking step. Analysis of the electrostatic potential of the CASPK (**A**), TM9S3 (**B**), TMEM205 (**C**), and CD151 (**D**) proteins. Blue indicates a positive charge and red indicates a negative charge.
